# Supplementary material for: Structural diversity of Ag/3-nitrophthalate coordination polymers controlled by solvent and induction agent
Source: Royal Society of Chemistry journal article supplement (doi:10.1039/c2ce26659h), 2012-11-28

## Electronic Supplementary Information (ESI) for CrystEngComm

### Structural diversity of Ag/3-nitrophthalate coordination polymers controlled by solvent and induction agent

Di Sun,<sup>\*a</sup> Fu-Jing Liu,<sup>b</sup> Rong-Bin Huang,<sup>b</sup> Lan-Sun Zheng<sup>b</sup>

<sup>a</sup>Key Lab of Colloid and Interface Chemistry, Ministry of Education, School of Chemistry and Chemical Engineering, Shandong University, Jinan, Shandong, 250100, China.

E-mail: dsun@sdu.edu.cn; Fax: +86-531-88364218.

<sup>b</sup>State Key Laboratory of Physical Chemistry of Solid Surface, Department of Chemistry, College of Chemistry and Chemical Engineering, Xiamen University, Xiamen, 361005, China.

|                                                                                                                          |   |
|--------------------------------------------------------------------------------------------------------------------------|---|
| (1) Table S1 The hydrogen bond geometries for 1-4. ....                                                                  | 2 |
| (2) Fig. S1 The powder XRD patterns and the simulated one from the single-crystal diffraction data for complex 1-4 ..... | 3 |
| (3) Fig. S2 IR of complexes 1-4.....                                                                                     | 4 |
| (4) Fig. S3: The silver wire in 1. ....                                                                                  | 6 |
| (5) Fig. S4: The [(NH <sub>4</sub> )(H <sub>2</sub> O)] <sup>+</sup> cluster in the lacuna of the 2D sheet.....          | 7 |
| (6) Fig. S5: TGA curves for CPs 1-4. ....                                                                                | 8 |

**(1) Table S1** The hydrogen bond geometries for **1-4**.

| Complex 1                                                                                                                                   |      |       |       |     |         |
|---------------------------------------------------------------------------------------------------------------------------------------------|------|-------|-------|-----|---------|
| D—H...A                                                                                                                                     | D—H  | H...A | D...A |     | D—H...A |
| N2—H2B...O4 <sup>iv</sup>                                                                                                                   | 0.91 | 2.20  | 3.077 | (5) | 160.9   |
| N2—H2C...O3                                                                                                                                 | 0.91 | 2.30  | 3.013 | (5) | 135.5   |
| N2—H2D...O4 <sup>i</sup>                                                                                                                    | 0.91 | 2.14  | 2.977 | (5) | 152.3   |
| N3—H3C...O4 <sup>v</sup>                                                                                                                    | 0.91 | 2.17  | 3.007 | (5) | 152.2   |
| N3—H3A...O1 <sup>ii</sup>                                                                                                                   | 0.91 | 2.04  | 2.947 | (5) | 173.7   |
| N3—H3B...O6 <sup>vi</sup>                                                                                                                   | 0.91 | 2.39  | 3.079 | (5) | 132.6   |
| Symmetry codes: (i) $-x+1, -y+1, -z+2$ ; (ii) $x, y, z-1$ ; (iv) $x-1, y, z$ ; (v) $x-1, y, z-1$ ; (vi) $x-1/2, -y+3/2, z-1/2$ .            |      |       |       |     |         |
| Complex 2                                                                                                                                   |      |       |       |     |         |
| N2—H2A...O6 <sup>ii</sup>                                                                                                                   | 0.90 | 2.06  | 2.928 | (4) | 161.2   |
| N2—H2B...O1 <sup>vi</sup>                                                                                                                   | 0.90 | 2.42  | 3.314 | (5) | 174.2   |
| N2—H2C...O2 <sup>iii</sup>                                                                                                                  | 0.90 | 2.44  | 3.301 | (5) | 160.4   |
| Symmetry codes: (ii) $x, y-1, z$ ; (iii) $x, -y+3/2, z+1/2$ ; (vi) $x, -y+3/2, z-1/2$ .                                                     |      |       |       |     |         |
| Complex 3                                                                                                                                   |      |       |       |     |         |
| N2—H2C...O3                                                                                                                                 | 0.85 | 2.09  | 2.875 | (5) | 153.2   |
| N2—H2E...O4 <sup>iv</sup>                                                                                                                   | 0.85 | 1.92  | 2.764 | (5) | 173.3   |
| N2—H2D...O3 <sup>ii</sup>                                                                                                                   | 0.85 | 2.27  | 3.037 | (5) | 149.9   |
| N2—H2B...O1W                                                                                                                                | 0.85 | 2.01  | 2.851 | (5) | 173.1   |
| O1W—H1WB...O2 <sup>v</sup>                                                                                                                  | 0.85 | 2.05  | 2.827 | (5) | 151.3   |
| O1W—H1WA...O2                                                                                                                               | 0.85 | 2.16  | 2.774 | (5) | 128.8   |
| Symmetry codes: (ii) $-x+1, y+1/2, -z+1/2$ ; (iv) $x, y+1, z$ ; (v) $-x+1/2, y+1/2, z$ .                                                    |      |       |       |     |         |
| Complex 4                                                                                                                                   |      |       |       |     |         |
| N3—H3B...O3 <sup>iv</sup>                                                                                                                   | 0.91 | 2.10  | 3.005 | (7) | 172.1   |
| N3—H3C...O7 <sup>i</sup>                                                                                                                    | 0.91 | 2.22  | 3.085 | (6) | 158.0   |
| N3—H3D...O11 <sup>vi</sup>                                                                                                                  | 0.91 | 2.48  | 3.017 | (7) | 117.7   |
| N4—H4B...O5 <sup>ii</sup>                                                                                                                   | 0.91 | 2.26  | 3.166 | (7) | 177.9   |
| N4—H4D...O10                                                                                                                                | 0.91 | 2.47  | 3.314 | (7) | 153.5   |
| N4—H4C...O1W <sup>vii</sup>                                                                                                                 | 0.91 | 2.14  | 2.993 | (7) | 155.3   |
| N5—H5A...O9 <sup>iv</sup>                                                                                                                   | 0.91 | 2.04  | 2.879 | (6) | 152.1   |
| N5—H5B...O1W <sup>ii</sup>                                                                                                                  | 0.91 | 2.13  | 2.973 | (7) | 153.7   |
| N5—H5C...O10                                                                                                                                | 0.91 | 2.06  | 2.848 | (6) | 143.6   |
| N6—H6A...O2 <sup>i</sup>                                                                                                                    | 0.91 | 2.21  | 3.037 | (7) | 151.2   |
| N6—H6B...O9 <sup>iv</sup>                                                                                                                   | 0.91 | 2.43  | 3.072 | (7) | 127.7   |
| N6—H6C...O8                                                                                                                                 | 0.91 | 2.40  | 3.054 | (7) | 128.7   |
| O1W—H1WA...O3                                                                                                                               | 0.85 | 1.93  | 2.760 | (6) | 164.9   |
| O1W—H1WB...O1 <sup>viii</sup>                                                                                                               | 0.85 | 2.02  | 2.848 | (6) | 164.5   |
| Symmetry codes: (i) $-x+1, -y+1, -z+1$ ; (ii) $-x+1, -y+1, -z+2$ ; (iv) $x+1, y, z$ ; (vi) $-x+1, y-1/2, -z+3/2$ ; (vii) $-x, -y+1, -z+2$ . |      |       |       |     |         |

(2) Fig. S1 The powder XRD patterns and the simulated one from the single-crystal diffraction data for complex 1-4

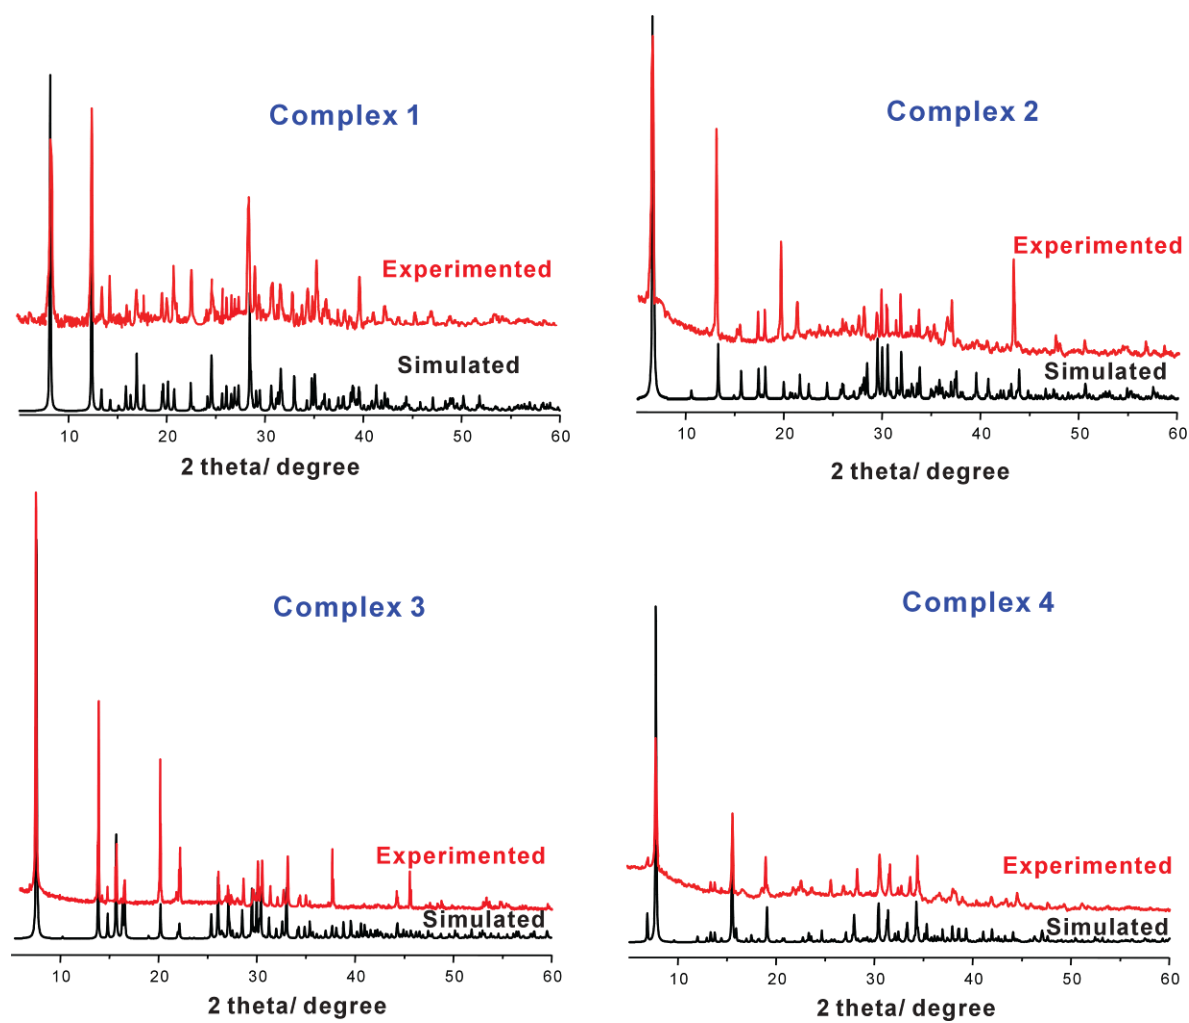

(3) Fig. S2 IR of complexes 1-4

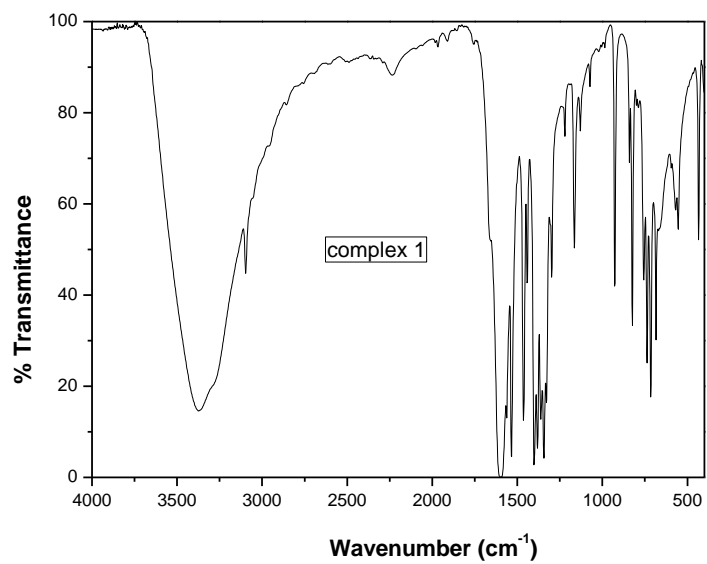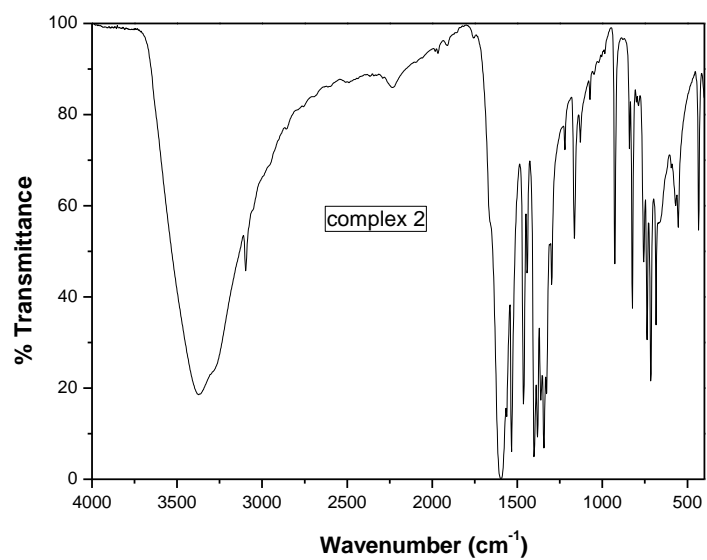

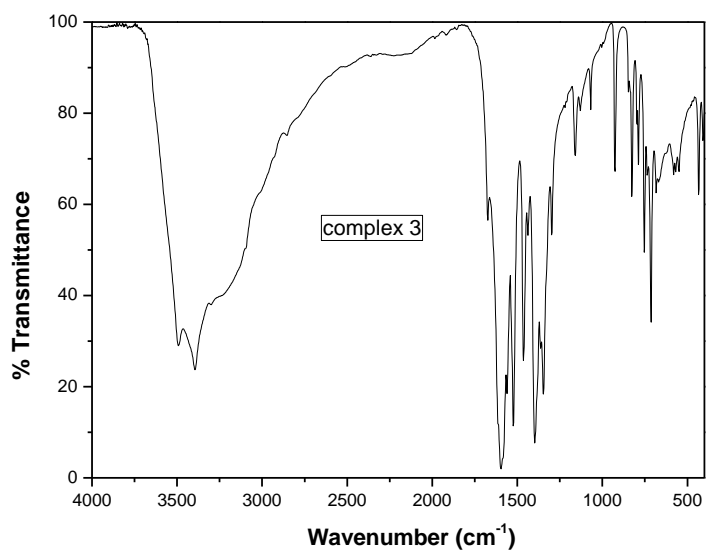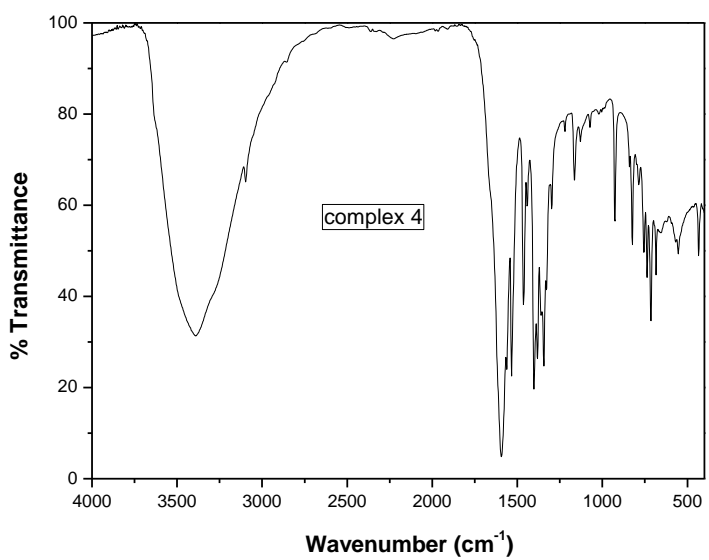

(4) Fig. S3: The silver wire in 1.

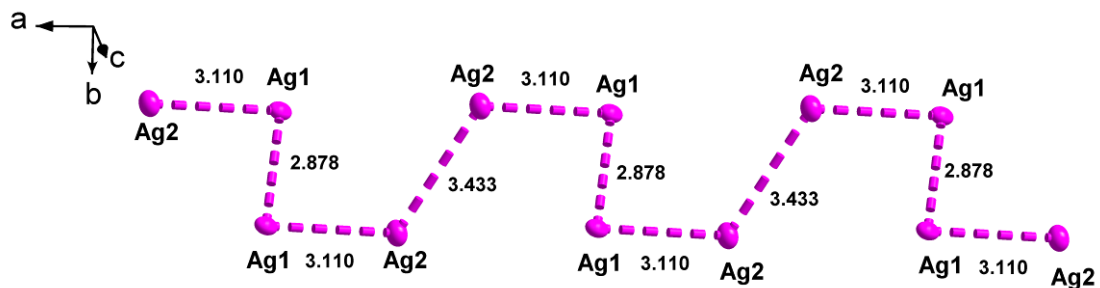

(5) Fig. S4: The  $[(\text{NH}_4)(\text{H}_2\text{O})]^+$  cluster in the lacuna of the 2D sheet

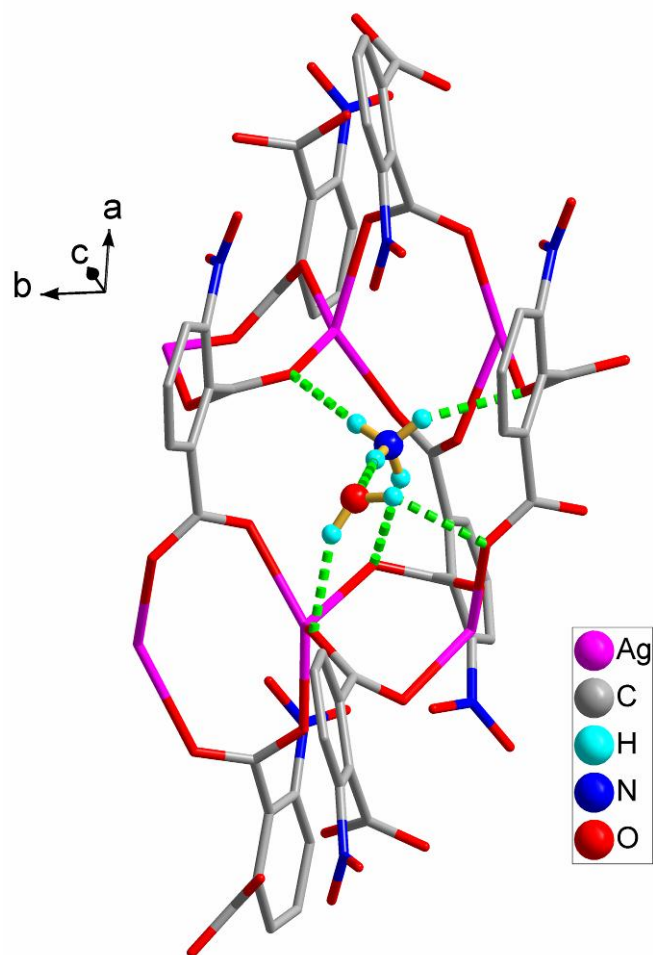

(6) Fig. S5: TGA curves for CPs 1-4.

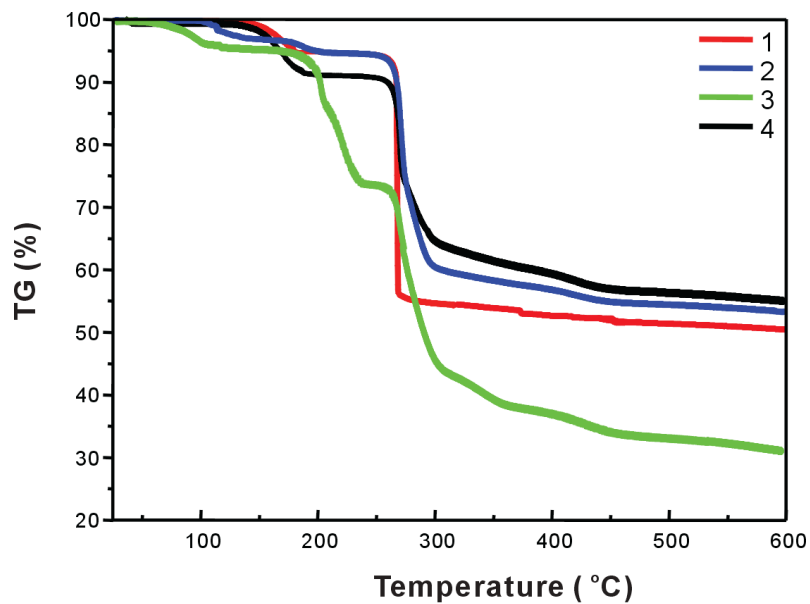

Supplement: c2ce26659h.pdf [file c2ce26659h.pdf]
